# Supplementary material
Source: PubMed Central journal article supplement (PMC3805170)
Supplement: supp_cit488_cit488supp.pdf [file supp_cit488_cit488supp.pdf]

**ONLINE SUPPLEMENT - TABLE 1. U.S. Cases of TB following SOT reported in the medical literature.**

| Reference                  | Types of transplant        | Total SOTs | TB cases post-transplant | Recipient TST prior to transplant (positive/no. tested) | TB-related deaths (Deaths/No. reported) |
|----------------------------|----------------------------|------------|--------------------------|---------------------------------------------------------|-----------------------------------------|
| Hill 1967 [55]             | Kidney, liver, spleen      | ----       | 2                        | Not stated                                              | 100%                                    |
| Lakshiminarayan 1973 [56]  | Kidney                     | ----       | 1                        | 0/1                                                     | 0%                                      |
| Neff 1973 [57]             | Kidney                     | 400        | 3                        | 0/1                                                     | 0%                                      |
| Batata 1977 [58]           | Kidney                     | ----       | 1                        | not stated                                              | 0%                                      |
| Vaz 1979 [59]              | Kidney                     | ----       | 1                        | not stated                                              | 100%                                    |
| Lloveras 1982 [60]         | Kidney                     | 1069       | 4                        | not stated                                              | 25%                                     |
| Lichtenstein 1983 [61]     | Kidney                     | ----       | 3                        | 1/2                                                     | 0%                                      |
| Spence 1983 [62]           | Kidney                     | 565        | 3                        | 0/3                                                     | 33%                                     |
| Wood 1983 [63]             | Kidney                     | ----       | 1                        | not stated                                              | 0%                                      |
| Peters 1984 [64]           | Kidney                     | ----       | 2                        | not stated                                              | 50%                                     |
| Mansour 1990 [65]          | Kidney                     | ----       | 1                        | not stated                                              | 0%                                      |
| Salizzoni 1992 [66]        | Liver                      | ----       | 1                        | 1 mo                                                    | 0%                                      |
| Delaney 1993 [67]          | Kidney                     | 1219       | 7                        | not stated                                              | 0%                                      |
| Jereb 1993 [68]            | Kidney                     | ----       | 10                       | 0/9                                                     | 38% (3/8)                               |
| Kramer 1993 [69]           | Heart-lung                 | 73         | 1                        | 0/1                                                     | 100%                                    |
| Ahsan 1995 [70]            | Kidney                     | ----       | 1                        | 0/1                                                     | 0%                                      |
| McDiarmid 1995 [71]        | Liver                      | ----       | 2                        | not stated                                              | 0%                                      |
| Miller 1995 [72]           | Lung                       | ----       | 1                        | 0/1                                                     | 100%                                    |
| Chusid 1996 [73]           | Lung-liver                 | ----       | 1                        | 0/1                                                     | 0%                                      |
| Ridgeway 1996 [74]         | Lung                       | ----       | 2                        | not stated                                              | 0%                                      |
| Klemperer 1998 [75]        | Kidney                     | ----       | 1                        | 0/1                                                     | 0%                                      |
| Chaparro 1999 [76]         | Liver                      | 751        | 2                        | 1/1                                                     | not stated                              |
| Kesten 1999 [4]            | Lung                       | 210        | 2                        | not stated                                              | 0%                                      |
| Meyers 2000 [54]           | Liver                      | 924        | 9                        | 2/6                                                     | 33%                                     |
| Paciocco 2000 [77]         | Lung                       | 157        | 1                        | 0/1                                                     | 0%                                      |
| Dowdy 2001 [78]            | Kidney                     | ----       | 3                        | 2/3                                                     | 100%                                    |
| Henderson 2003 [79]        | Liver                      | ----       | 1                        | not known                                               | 100%                                    |
| Klote 2004 [10]            | Kidney                     | 1587       | 66                       | not known                                               | 23%                                     |
| Winthrop 2004 [36]         | Lung                       | ----       | 1                        | not stated                                              | 0%                                      |
| Boedefeld 2008 [80]        | Lung                       | ----       | 1                        | not done                                                | 100%                                    |
| CDC 2008 [38]              | Kidney                     | ----       | 2                        | not stated                                              | 100%                                    |
| Walsh 2008 [81]            | Kidney                     | 477        | 2                        | 0/2                                                     | 100%                                    |
| Jazrawi 2009 [82]          | Heart                      | ----       | 1                        | 0/1                                                     | 0%                                      |
| Lopez de Castilla 2010 [5] | Kidney, heart, liver, lung | 4925       | 13                       | not known                                               | not stated                              |
| Theodoropoulos 2012 [17]   | Kidney, liver, lung        | 2213       | 9                        | 2/8                                                     | 13% (1/8)                               |

54. Meyers BR, Papanicolaou GA, Sheiner P, Emre S, Miller C. Tuberculosis in orthotopic liver transplant patients: increased toxicity of recommended agents; cure of disseminated infection with nonconventional regimens. *Transplantation* **2000**; 69(1): 64-9.
55. Hill RB, Jr., Dahrling BE, 2nd, Starzl TE, Rifkind D. Death after transplantation; an analysis of sixty cases. *The American journal of medicine* **1967**; 42(3): 327-34.
56. Lakshiminarayan S, Sahn SA. Tuberculosis in a patient after renal transplantation. *Tubercle* **1973**; 54(1): 72-6.
57. Neff TA, Hudge DW. Miliary tuberculosis in a renal transplant recipient. *The American review of respiratory disease* **1973**; 108(3): 677-8.
58. Batata MA. Pulmonary tuberculosis in a renal transplant recipient. *JAMA : the journal of the American Medical Association* **1977**; 237(14): 1465.
59. Vaz AJ. Miliary tuberculosis and the adult respiratory distress syndrome in a renal transplant recipient. *Chest* **1979**; 75(3): 412.
60. Lloveras J, Peterson PK, Simmons RL, Najarian JS. Mycobacterial infections in renal transplant recipients. Seven cases and a review of the literature. *Archives of internal medicine* **1982**; 142(5): 888-92.
61. Lichtenstein IH, MacGregor RR. Mycobacterial infections in renal transplant recipients: report of five cases and review of the literature. *Reviews of infectious diseases* **1983**; 5(2): 216-26.
62. Spence RK, Dafoe DC, Rabin G, et al. Mycobacterial infections in renal allograft recipients. *Archives of surgery* **1983**; 118(3): 356-9.
63. Wood M, Wallin JD, O'Neill W, Jr. Disseminated tuberculosis in a renal transplant recipient: presentation as an anterior mediastinal mass. *Southern medical journal* **1983**; 76(12): 1577-9.
64. Peters TG, Reiter CG, Boswell RL. Transmission of tuberculosis by kidney transplantation. *Transplantation* **1984**; 38(5): 514-6.
65. Mansour AM. Renal allograft tuberculosis. *Tubercle* **1990**; 71(2): 147-8.
66. Salizzoni JL, Tiruvilumala P, Reichman LB. Liver transplantation: an unheralded probable risk for tuberculosis. *Tubercle and lung disease : the official journal of the International Union against Tuberculosis and Lung Disease* **1992**; 73(4): 232-8.
67. Delaney V, Sumrani N, Hong JH, Sommer B. Mycobacterial infections in renal allograft recipients. *Transplantation proceedings* **1993**; 25(3): 2288-9.
68. Jereb JA, Burwen DR, Dooley SW, et al. Nosocomial outbreak of tuberculosis in a renal transplant unit: application of a new technique for restriction fragment length polymorphism analysis of *Mycobacterium tuberculosis* isolates. *The Journal of infectious diseases* **1993**; 168(5): 1219-24.
69. Kramer MR, Marshall SE, Starnes VA, Gamberg P, Amitai Z, Theodore J. Infectious complications in heart-lung transplantation. Analysis of 200 episodes. *Archives of internal medicine* **1993**; 153(17): 2010-6.
70. Ahsan N, Blanchard RL, Mai ML. Gastrointestinal tuberculosis in renal transplantation: a case report and review. *Clinical transplantation* **1995**; 9(4): 349-52.
71. McDiarmid SV, Blumberg DA, Remotti H, et al. Mycobacterial infections after pediatric liver transplantation: a report of three cases and review of the literature. *Journal of pediatric gastroenterology and nutrition* **1995**; 20(4): 425-31.
72. Miller RA, Lanza LA, Kline JN, Geist LJ. Mycobacterium tuberculosis in lung transplant recipients. *American journal of respiratory and critical care medicine* **1995**; 152(1): 374-6.

73. Chusid MJ, Splaingard ML, Tweddell JS, et al. Pulmonary tuberculosis after lung-liver transplantation from cystic fibrosis. *The Pediatric infectious disease journal* **1996**; 15(5): 462-4.
74. Ridgeway AL, Warner GS, Phillips P, et al. Transmission of *Mycobacterium tuberculosis* to recipients of single lung transplants from the same donor. *American journal of respiratory and critical care medicine* **1996**; 153(3): 1166-8.
75. Klemperer JD, Wang J, Hartman BJ, Stubenbord WT. *Mycobacterium tuberculosis* infection of a native polycystic kidney following renal transplantation. *Transplantation* **1998**; 66(1): 118-20.
76. Chaparro SV, Montoya JG, Keeffe EB, Rhee JT, Small PM. Risk of tuberculosis in tuberculin skin test-positive liver transplant patients. *Clinical infectious diseases : an official publication of the Infectious Diseases Society of America* **1999**; 29(1): 207-8.
77. Paciocco G, Martinez FJ, Kazerooni EA, Bossone E, Lynch JP, 3rd. Tuberculous pneumonia complicating lung transplantation: case report and review of the literature. *Monaldi archives for chest disease = Archivio Monaldi per le malattie del torace / Fondazione clinica del lavoro, IRCCS [and] Istituto di clinica fisiologica e malattie apparato respiratorio, Universita di Napoli, Secondo ateneo* **2000**; 55(2): 117-21.
78. Dowdy L, Ramgopal M, Hoffman T, et al. Genitourinary tuberculosis after renal transplantation: report of 3 cases and review. *Clinical infectious diseases : an official publication of the Infectious Diseases Society of America* **2001**; 32(4): 662-6.
79. Henderson C, Meyers B, Humayun Gultekin S, Liu B, Zhang DY. Intracranial tuberculoma in a liver transplant patient: first reported case and review of the literature. *American journal of transplantation : official journal of the American Society of Transplantation and the American Society of Transplant Surgeons* **2003**; 3(1): 88-93.
80. Boedefeld RL, Eby J, Boedefeld WM, 2nd, et al. Fatal *Mycobacterium tuberculosis* infection in a lung transplant recipient. *The Journal of heart and lung transplantation : the official publication of the International Society for Heart Transplantation* **2008**; 27(10): 1176-8.
81. Walsh R, Ortiz J, Foster P, Palma-Vargas J, Rosenblatt S, Wright F. Fungal and mycobacterial infections after Campath (alemtuzumab) induction for renal transplantation. *Transplant infectious disease : an official journal of the Transplantation Society* **2008**; 10(4): 236-9.
82. Jazrawi A, Jones M, Kfoury AG, et al. Tuberculosis in a solid-organ transplant recipient: modern-day implications. *The Journal of heart and lung transplantation : the official publication of the International Society for Heart Transplantation* **2009**; 28(2): 191-3.
